# Supplementary material for: Biologically relevant mono- and di-nuclear manganese ii/iii/iv complexes of mononegative pentadentate ligandsElectronic supplementary information (ESI) available: The ESI mass spectra of 1 at various tube-lens potentials. See http://www.rsc.org/suppdata/dt/b3/b300823a/
Source: Royal Society of Chemistry journal article supplement (doi:10.1039/b300823a), 2003-03-18
Supplement: b300823a.doc [file b300823a.doc]

# Supplementary data

**ESI MS**

Finnigan TSQ 700 triple quadrapole instrument equipped with a Finnigan API source in the nanoelectrospray mode. Typical conditions were spray voltage 0.8 kV, heated capillary 125C (-15V) and tubelens 60V. The ESI mass spectra of [Mn2(mgbpen)2(H2O)2](ClO4)2 (**1**) using ethanol as spray solvent is shown on the next page at various tubelens potentials. The isotope distribution shows that the dimer, [Mn2(mgbpen)2]2+,is present under low energy conditions and the monomer, [Mn(mgbpen)]+, at high. Both have the same *m/z* value but are doubly- and singly- charged respectively.

Tubelens 40V

Tubelens 50V

Tubelens 60V

Tubelens 70V

Tubelens 100V

Tubelens 80V

Tubelens 100V
